# Supplementary material
Source: MDPI journal article supplement (https://www.mdpi.com/2312-7481/9/7/169)
Supplement: s1 [file s1]

Article

# Microstructure and Magnetic Property Evolution Induced by Heat Treatment in Fe-Si/SiO<sub>2</sub> Soft Magnetic Composites

Shaogang Li <sup>†</sup>, Nachuan Ju <sup>†</sup>, Jinyang Wang, Rongyu Zou, Shaochuan Lin and Minghui Yang <sup>\*</sup>

Key Laboratory of Green Fabrication and Surface Technology of Advanced Metal Materials (Anhui University of Technology), Ministry of Education, Ma'anshan 243002, China; ahutlsg@163.com (S.L.); jnc18655564069@163.com (N.J.); mm55545164@163.com (R.Z.); chaim\_lsc@163.com (S.L.)

<sup>\*</sup> Correspondence: author: 19810763904@163.com

<sup>†</sup> These authors contributed equally to this work.

*Supplement the missing Table S1.*

**Table S1.**  $C_{hyst}$ ,  $C_{ec}$ ,  $C_{exc}$  and other fitting parameters of the SMCs heat-treated at various temperatures.

| Heat treatment temperature (K) | Hysteresis Component |          | Eddy Current Component | Excess Component |         |         | R-square |
|--------------------------------|----------------------|----------|------------------------|------------------|---------|---------|----------|
|                                | $C_{hyst}$           | $\alpha$ | $C_{ec}$               | $C_{exc}$        | $x$     | $y$     |          |
| Without heat treatment         | 49.87                | 1.8917   | 0.191899               | 0.6531           | 2.09873 | 1.41592 | 0.9998   |
| 823                            | 35.14                | 1.97074  | 0.182536               | 0.14136          | 2.03687 | 2.08583 | 0.9971   |
| 873                            | 32.15                | 1.96886  | 0.180726               | 0.05776          | 1.87324 | 2.07973 | 0.9989   |
| 923                            | 28.12                | 1.93788  | 0.169339               | 0.5312           | 1.852   | 1.5748  | 0.9983   |
| 973                            | 33.11                | 1.99461  | 0.175854               | 0.36571          | 1.85545 | 1.79298 | 0.9993   |
| 1023                           | 41.93                | 1.9491   | 0.244583               | 1.83732          | 1.9827  | 1.46281 | 0.9995   |
